# Supplementary material for: Requirement of hepatic pyruvate carboxylase during fasting, high fat, and ketogenic diet
Source: PubMed Central journal article supplement (PMC9694104; doi:10.1016/j.jbc.2022.102648), 2022-10-28

## Supporting Figure 2.

Liver specific pyruvate carboxylase knockout female mice fed a high fat diet.

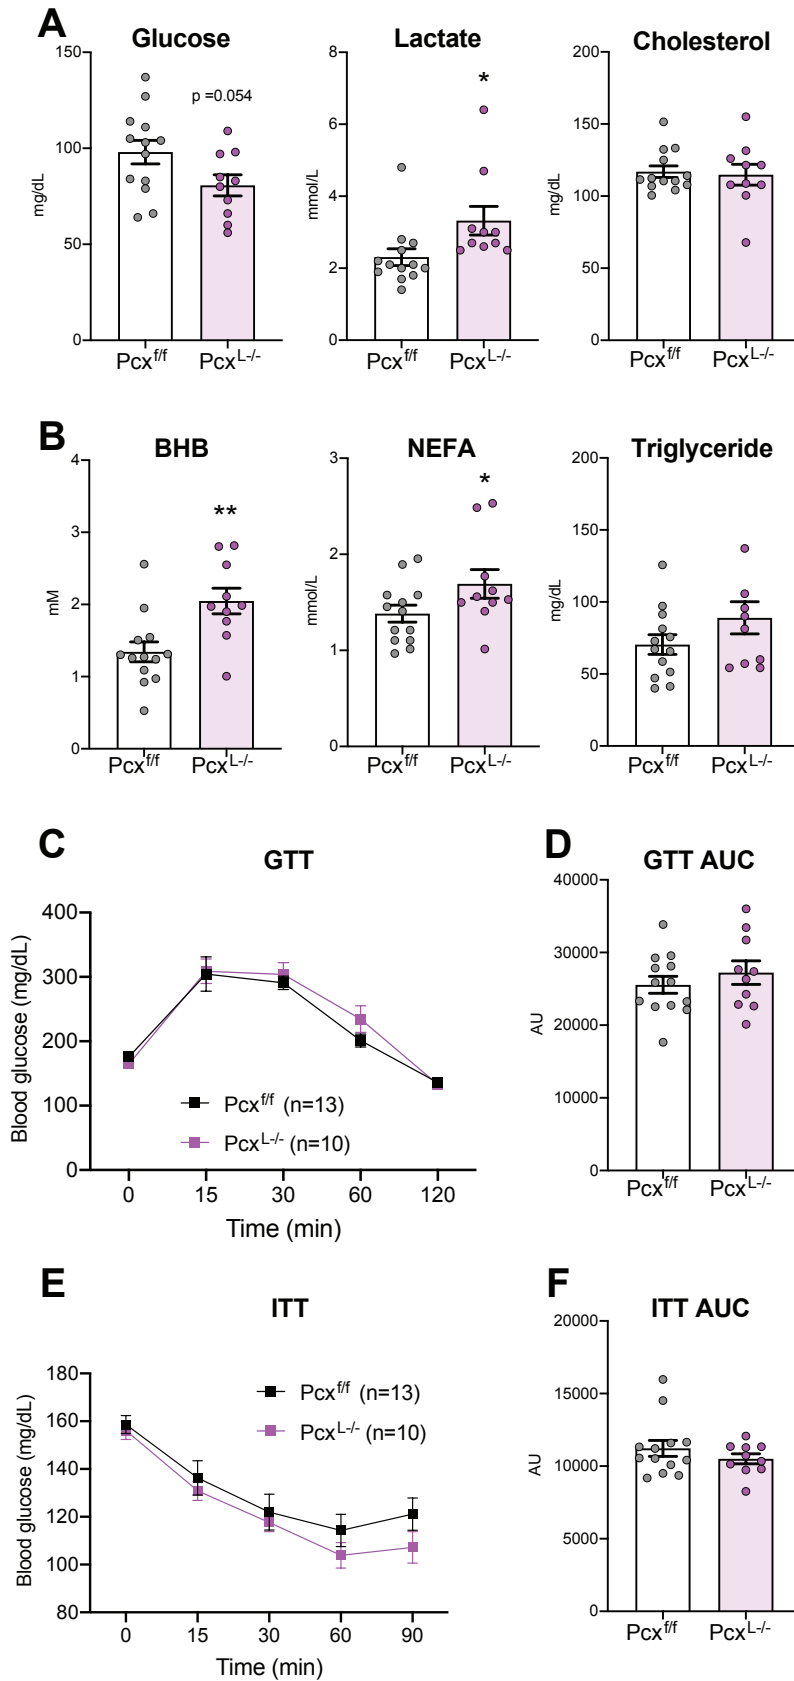

Supplement: mmc7.pdf [file mmc7.pdf]
