# Supplementary material for: Requirement of hepatic pyruvate carboxylase during fasting, high fat, and ketogenic diet
Source: PubMed Central journal article supplement (PMC9694104; doi:10.1016/j.jbc.2022.102648), 2022-10-28

### Supporting Figure 3.

A ketogenic diet causes metabolic decompensation in female liver specific pyruvate carboxylase knockout mice.

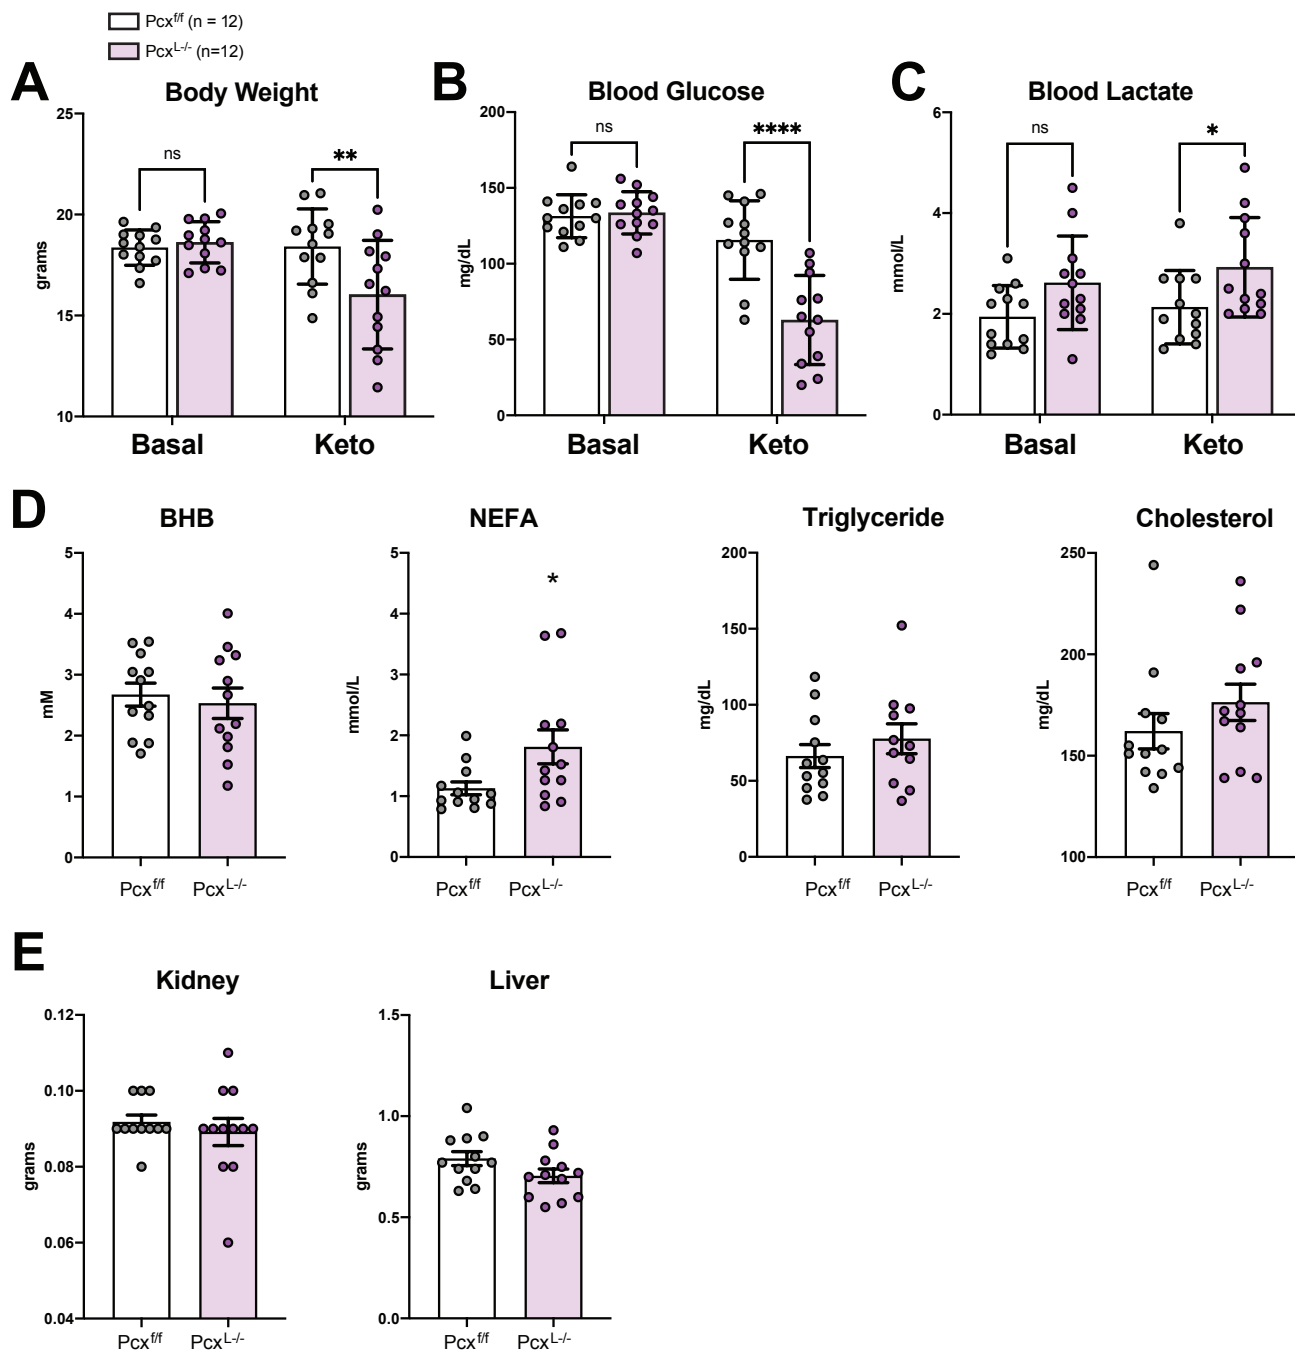

Supplement: mmc8.pdf [file mmc8.pdf]
